# Supplementary material for: Intriguing electronic and optical prospects of FCC bimetallic two-dimensional heterostructures: epsilon near-zero behavior in UV-Vis range
Source: Royal Society of Chemistry journal article supplement (doi:10.1039/d0cp00951b), 2020-01-01
Supplement: d0cp00951b1.pdf [file d0cp00951b1.pdf]

## Supporting Information for

# Intriguing electronic and optical prospects of FCC bimetallic two-dimensional heterostructures: epsilon near-zero behaviour in UV-vis range

Tuhin Kumar Maji<sup>1</sup>, Kumar Vaibhav<sup>2</sup>, Ranjit Hawaldar<sup>3</sup>, K. V. Adarsh<sup>4</sup>, Samir Kumar Pal<sup>1</sup> and Debjani Karmakar<sup>5,\*</sup>

<sup>1</sup>*Department of Chemical Biological and Macromolecular Sciences, S.N. Bose National Centre for Basics Sciences, Salt Lake, Sector 3, Kolkata 700106, India*

<sup>2</sup>*Computer Division, Bhabha Atomic Research Centre, Trombay 400085, India*

<sup>3</sup>*Centre for Materials for Electronics Technology, Off Pashan Road, Panchwati, Pune-411008, India*

<sup>4</sup>*Department of Physics, Indian Institute of Science Education and Research, Bhopal 462066, India*

<sup>5</sup>*Technical Physics Division, Bhabha Atomic Research Centre, Trombay 400085, India*

\*Corresponding author:

Debjani Karmakar: [debjan@barc.gov.in](mailto:debjan@barc.gov.in)

## METHODOLOGY:

### Optical Property Calculation

#### A. TDDFT Formulation

TDDFT aims at mapping the time-dependent Schrödinger equation onto an effective one-electron problem, where time dependence is incorporated in the approximation of the exchange-correlation kernel (xck) from the explicit time dependence of the exchange-correlation potential and electron-density as:

$$f_{xc}(r, r', t - t') = \frac{\partial v_{xc}(r, t)}{\partial \rho(r', t')} \quad (1)$$

Calculation of optical absorption involves many-body perturbative approach of solution of Bethe Salpeter Equation (BSE) using the one-body Green's function. In BSE, the dielectric function can be written in terms of the xck as [1] :

$$\epsilon_{GG}^{-1}(q, \omega) = \delta_{GG} + v_{GG}(q) \chi'(q, \omega), \quad (2)$$

where  $v(q)$  is the bare Coulomb potential and  $\chi$  is the full response function, which is related to the response function  $\chi^0$  of the non-interacting Kohn-Sham system as:

$$\chi'(q, \omega) = \frac{v_{GG}(q) \chi_{GG}^0(q, \omega)}{1 - [v_{GG}(q) + f_{xc}(q, \omega)] \chi_{GG}^0(q, \omega)} \quad (3)$$

The frequency independent approximation for the xck, known as the Bootstrap kernel, is computationally less exorbitant than a rigorous solution of the BSE:

$$f_{xc}^{TDDFT}(q, \omega) = \frac{\epsilon^{-1}(q, \omega = 0)}{\chi_{GG}^0(q, \omega = 0)} \quad (4)$$

The coupled equations (2), (3) and (4) are solved by initially setting  $f_{xc}^{TDDFT} = 0$  and then calculating  $\chi'(q, \omega)$  and thus  $\epsilon_{GG}^{-1}(q, \omega)$ . This value is then utilized in equation (6) to find out the new  $f_{xc}^{TDDFT}$ . This procedure is repeated until self-consistency is obtained at  $\omega = 0$ .

The long-range component of exchange-correlation kernel is frequency independent having the form  $-\alpha^{\text{static}} / q^2$ . More detailed and accurate formulation involves introducing frequency dependence. The long-range contribution kernel (LRC) assimilates the frequency dependence in the following form into the dynamical exchange:

$$f_{xc}^{\text{dyn}}(q, \omega) = -\frac{1}{q^2}(\alpha + \beta\omega^2) \quad (5)$$

This improvement of dynamical kernel has improved the calculations to obtain important information about the exciton and charged excitons[2].

### B. Interband and intraband contribution to the dielectric response function

The real and imaginary parts of the interband dielectric response function in tensor form are computed as[3]:

$$\begin{aligned} \epsilon_{\alpha\beta}^{(1)}(\hat{q}, \omega) &= 1 + \frac{4\pi e^2}{V} \lim_{q \rightarrow 0} \frac{1}{q^2} \sum_{nmk} 2f_{nk} \langle u_{mk+e_{\alpha q}} | u_{nk} \rangle \langle u_{nk} | u_{mk+e_{\beta q}} \rangle \times \left( \frac{1}{\epsilon_{mk} - \epsilon_{nk} - \omega} + \frac{1}{\epsilon_{mk} - \epsilon_{nk} + \omega} \right) \end{aligned} \quad (6)$$

and

$$\begin{aligned} \epsilon_{\alpha\beta}^{(2)}(\hat{q}, \omega) &= \frac{4\pi^2 e^2}{V} \lim_{q \rightarrow 0} \frac{1}{q^2} \sum_{nmk} 2f_{nk} \langle u_{mk+e_{\alpha q}} | u_{nk} \rangle \langle u_{nk} | u_{mk+e_{\beta q}} \rangle \times (\delta(\epsilon_{mk} - \epsilon_{nk} - \omega) - \delta(\epsilon_{mk} - \epsilon_{nk} + \omega)) \end{aligned} \quad (7)$$

For semiconductors and insulators, only interband transitions are important ( $n \neq m$ ). For metals, due to the occurrence of partially occupied bands, transitions within a band, often referred to as intra-band transitions are also important. The real part of intra-band dielectric function, dependent only on frequency of the incident light and the energy dispersion, can be written as:

$$\epsilon_{\alpha\beta}^{1 \text{ intra}} = -\frac{\bar{\omega}_{\alpha\beta}^2}{\omega^2} \quad (8)$$

where  $\bar{\omega}_{\alpha\beta}$  is the material specific property, referred to as the plasma frequency tensor, represented as:

$$\bar{\omega}_{\alpha\beta}^2 = \frac{4\pi e^2}{V} \sum_{nk} 2f_{nk} \frac{\partial^2 \epsilon_{nk}}{\partial k_\alpha \partial k_\beta} \quad (9)$$

The imaginary part is obtained from the Kramers-Kronig transformation:

$$\epsilon_{\alpha\beta}^2 = -\pi \bar{\omega}_{\alpha\alpha}^2 \frac{\partial \delta(\omega)}{\partial \omega} \quad (10)$$

After introducing the relaxation-time  $\tau$  under semiclassical approximation, the real and imaginary part of the intraband dielectric function can be written as:

$$\epsilon^1(\omega) = 1 - \frac{\bar{\omega}^2 \tau^2}{1 + \omega^2 \tau^2} \quad (11)$$

$$\epsilon^2(\omega) = \frac{\bar{\omega}^2 \tau}{\omega(1 + \omega^2 \tau^2)} \quad (12)$$

Therefore, for metals, the intra-band dielectric function has a near-zero frequency negative and positive divergence respectively for real and imaginary parts, which constitutes the ‘‘Drude-like’’ terms.

### Transmission coefficients calculation

$\Gamma$ -point centred interpolated transmission coefficients at zero bias perpendicular to the transport axis within the irreducible Brillouin zone (IBZ) are obtained for both the device geometries by using:

$$T^\parallel(E) = Tr[\Gamma_L^\parallel(E) g_\parallel(E) \Gamma_R^\parallel(E) g_\parallel^\dagger(E)] \quad (13)$$

where,  $g_\parallel$  is the retarded Green’s function,  $\Gamma_{L/R}$  is the level broadening with respect to the corresponding self-energies of the electrodes. This function, while integrated over the  $k$ -point mesh in the IBZ, results the transmission coefficient.

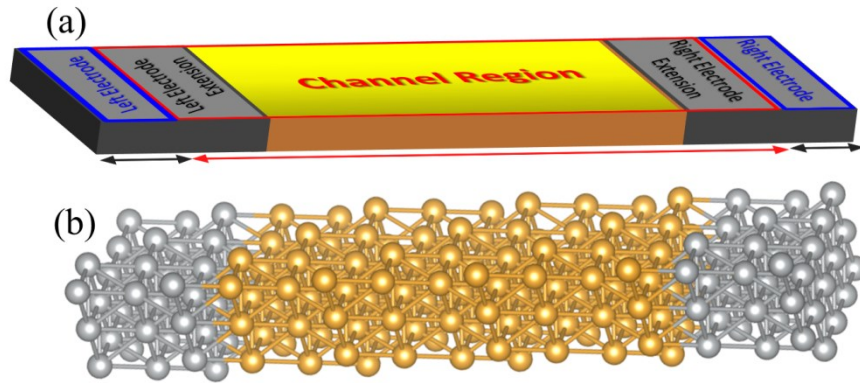

**Scheme S1** (a) A model device configuration having two electrodes, electrode extension and a central region, (b) model Au-channel Ag contact system.

**Table S1:** Bader Charge table of different systems

| System             | Total Charge (ideal) | Total Charge Bader | Ag Part      |              | Au Part      |              |
|--------------------|----------------------|--------------------|--------------|--------------|--------------|--------------|
|                    |                      |                    | Ideal Charge | Bader Charge | Ideal Charge | Bader Charge |
| Au/Ag-111 Embedded | 378                  | 383.46             | 141          | 168.78       | 237          | 214.68       |
|                    | 20439                | 20001.45           | 2585         | 2534.65      | 17854        | 17466.8      |
| Ag-doped Au        | 3536                 | 3607.74            | 376          | 371.54       | 3160         | 3236.20      |

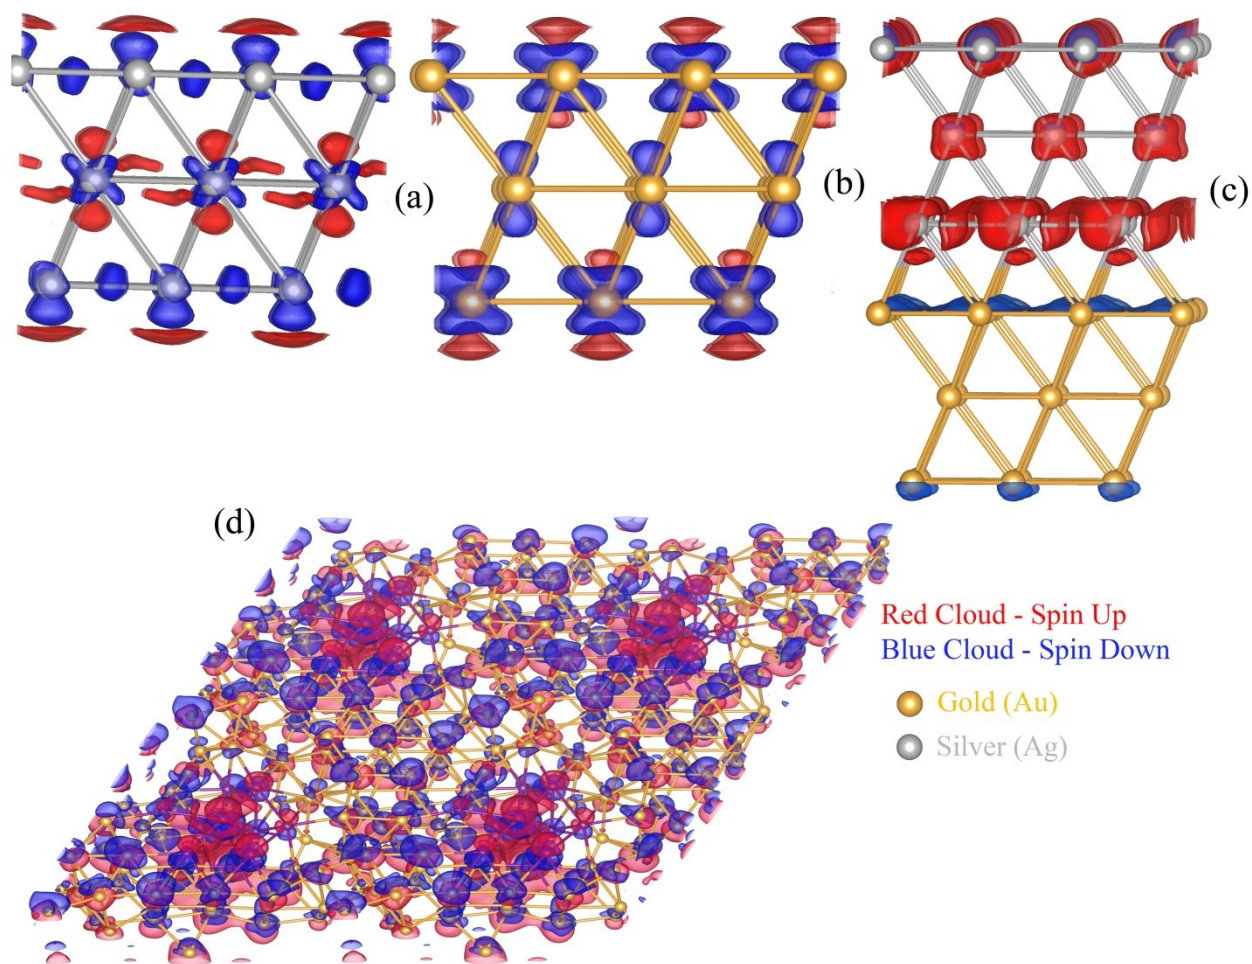

**Figure S1:** Converged spin density plot for a) Ag111, b) Au111, c) Au/Au-111 and d) Embedded system.

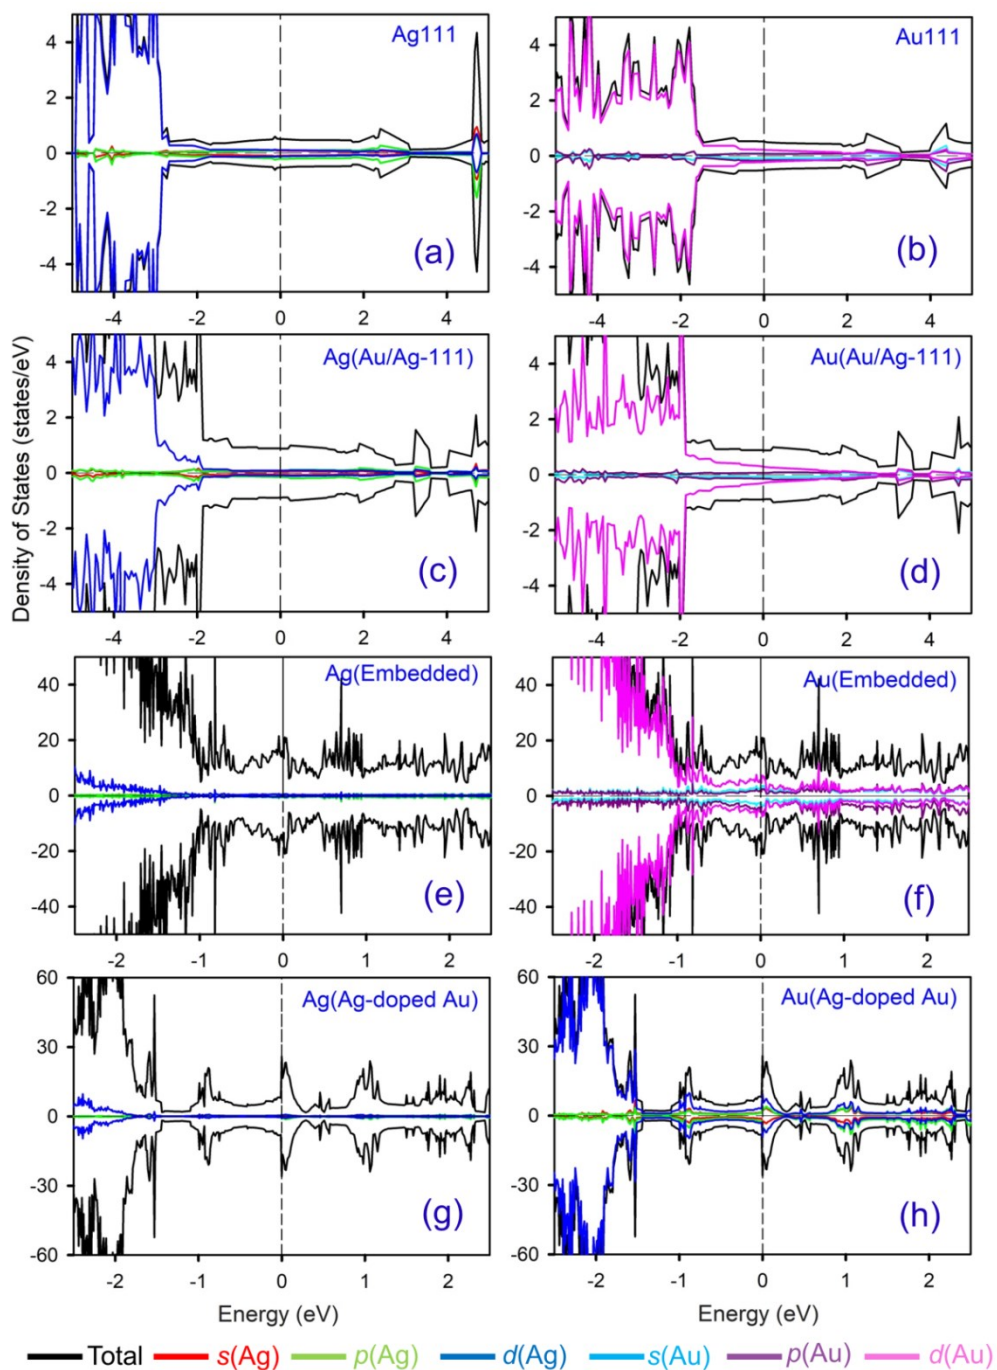

**Figure S2:** Orbital Projected Density of States for a) Ag111, b) Au111, c) contribution of Ag in Au/Ag-111, d) contribution of Au in Au/Ag-111, e) contribution of Ag in embedded, f) contribution of Au in embedded, g) contribution of Ag in Ag-doped Au and h) contribution of Au in Ag-doped Au

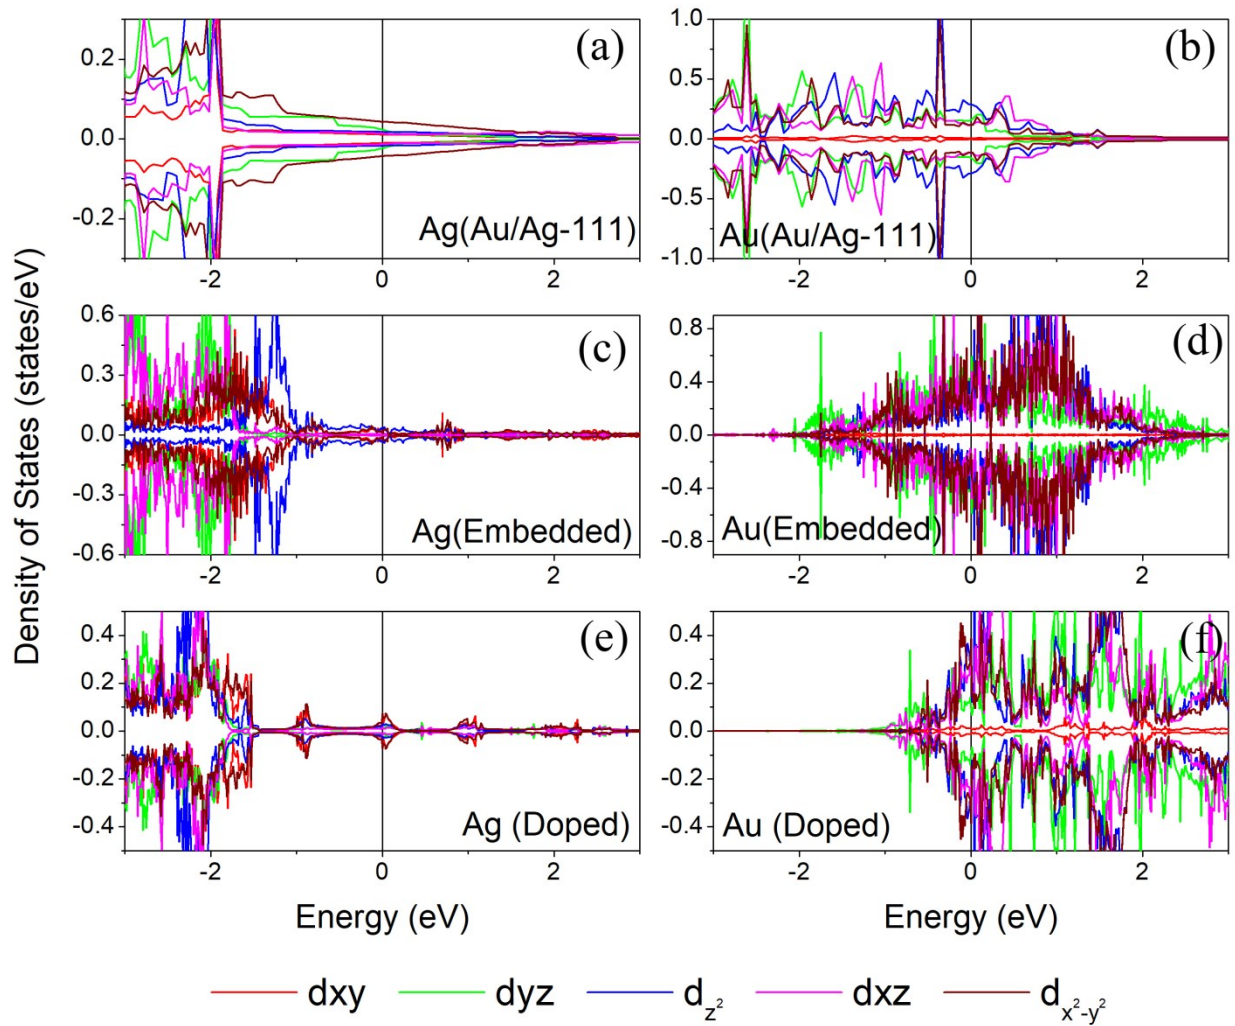

**Figure S3:** *d*-orbital Projected Density of States for a) contribution of Ag in Au/Ag-111, b) contribution of Au in Au/Ag-111, c) contribution of Ag and d) contribution of Au in embedded system, e) contribution of Ag and f) contribution of Au in doped system.

### Pd-Pt system

For this combination, we have created large-area interfaces created from Pt[111] and Pd[111]. The doped nanostructure was formed by doping Pt[111] matrix centrally with some Pd atoms. Both of these systems are having interesting optical properties. The epsilon-near-zero property, energy-zero divergence and the negative value of real part of epsilon is present as can be seen from Fig S5. Partially filled *d*-bands of both Pt and Pd generate flat-bands near Fermi-level.



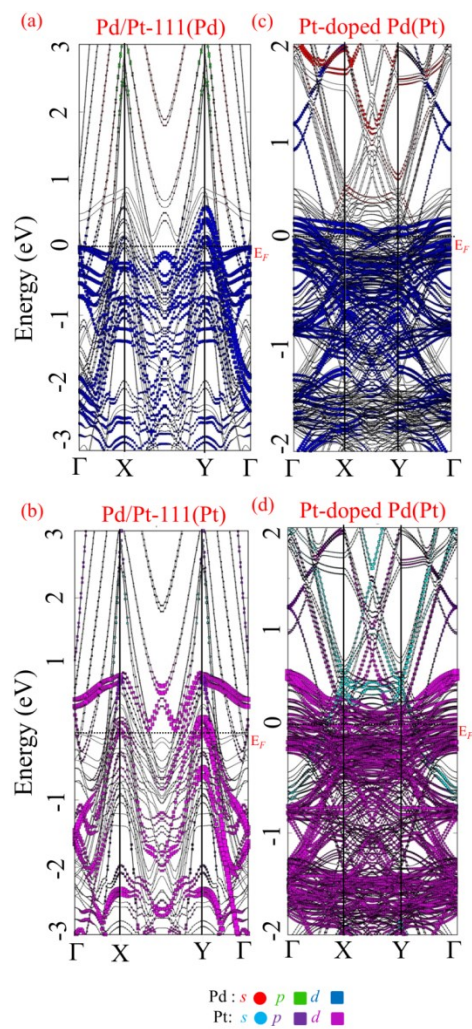

**Figure S4:** The orbital projected fatbands for orbital components of a) Pd in Pt/Pd-111 system, b) Pt in Pt/Pd-111 system, c) Pd in Pd-doped Pt system and d) Pt in Pd-doped Pt system.

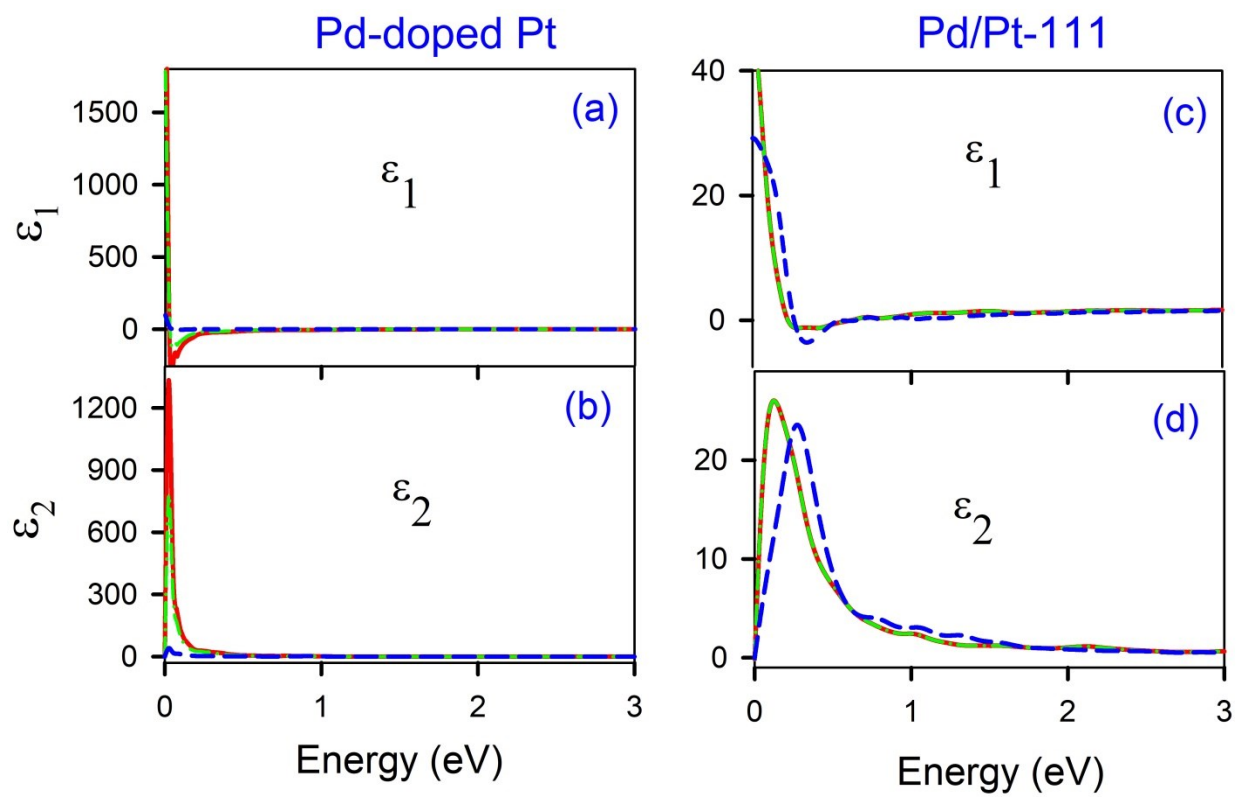

**Figure S5:** Real and Imaginary part of dielectric constant of Pd-doped and Pd/Pt-111 system.

## References

- [1] M. Dadsetani and A. R. Omid, RSC Advances **5**, 90559 (2015).
- [2] S. Botti, A. Fourreau, F. Nguyen, Y.-O. Renault, F. Sottile and L. Reining, Physical Review B **72**, 125203 (2005).
- [3] J. Harl, The Linear Response Function in Density Functional Theory (Dissertation), University of Vienna, 2008.
